# Supplementary material for: A bis(phosphinimino)methanide lanthanum amide as catalyst for the hydroamination/cyclisation, hydrosilylation and sequential hydroamination/hydrosilylation catalysis
Source: Royal Society of Chemistry journal article supplement (doi:10.1039/b514242c), 2006-01-01
Supplement: b514242c.pdf [file b514242c.pdf]

**A Bis(phosphinimino)methanide Lanthanum Amide as Catalyst for the  
Hydroamination / Cyclisation, Hydrosilylation and Sequential Hydroamination /  
Hydrosilylation Catalysis.**

Marcus Rastätter, Agustino Zulys and Peter W. Roesky\*

*Institut für Chemie und Biochemie, Freie Universität Berlin. Fabockstrasse 34-36, 14195  
Berlin, Germany. Fax: (+49)30 - 83852440; Tel: (+49)30 - 83854004; E-mail: roesky@chemie.fu-  
berlin.de*

**Supporting Information**

## Experimental Section.

*General:* All manipulations of air-sensitive materials were performed with the rigorous exclusion of oxygen and moisture in flame-dried Schlenk-type glassware either on a dual manifold Schlenk line, interfaced to a high vacuum ( $10^{-4}$  torr) line, or in an argon-filled M. Braun glove box. Ether solvents (THF and ethyl ether) were predried over Na wire and distilled under nitrogen from K (THF) or Na wire (ethyl ether) as well as benzophenone ketyl prior to use. Hydrocarbon solvents (toluene and *n*-pentane) were distilled under nitrogen from LiAlH<sub>4</sub>. All solvents for vacuum line manipulations were stored *in vacuo* over LiAlH<sub>4</sub> in resealable flasks. Deuterated solvents were obtained from Chemotrade Chemiehandelsgesellschaft mbH (all  $\geq 99$  atom % D) and were degassed, dried, and stored *in vacuo* over Na/K alloy in resealable flasks. NMR spectra were recorded on JNM-LA 400 FT-NMR spectrometer. Chemical shifts are referenced to internal solvent resonances and are reported relative to tetramethylsilane and 85 % phosphoric acid (<sup>31</sup>P NMR), respectively. Elemental analyses were carried out with an Elementar vario EL. LaCl<sub>3</sub>,<sup>1</sup> and {CH<sub>2</sub>(PPh<sub>2</sub>NSiMe<sub>3</sub>)<sub>2</sub>},<sup>2</sup> were prepared according to literature procedures.

*General for the Hydroamination and Hydrosilylation Reaction (NMR scale reaction):* Compound **1** was weighed under argon gas into an NMR tube. C<sub>6</sub>D<sub>6</sub> (~ 0.7 mL) was condensed into the NMR tube, and the mixture was frozen to  $-196$  °C. The reactant was injected onto the solid mixture, and the whole sample was melted and mixed just before the insertion into the core of the NMR machine (*t*<sub>0</sub>). The ratio between the reactant and the product was exactly calculated by comparison of the integrations of the corresponding signals.

### NMR data for the Hydrosilylation/Hydroamination

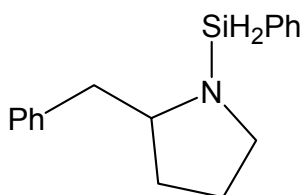

**2-Benzyl-1-(phenylsilyl)pyrrolidine**,  $^1\text{H}$  NMR ( $\text{C}_6\text{D}_6$ , 400 MHz,  $25^\circ\text{C}$ )  $\delta$  7.55 – 6.92 (m, 10H, 2Ph), 5.05 (dd,  $J(^1\text{H}, ^1\text{H}) = 10$  Hz, 2 H), 3.51 (m, 1H), 2.92 (m, 2H); 2.72 (dd,  $J(^1\text{H}, ^1\text{H}) = 5.4$  Hz, 1H); 2.32 (dd,  $J(^1\text{H}, ^1\text{H}) = 8.6$  Hz, 1H); 1.47 – 1.34 (m, 4H);  $^{13}\text{C}\{^1\text{H}\}$ -NMR ( $\text{C}_6\text{D}_6$ , 100 MHz,  $25^\circ\text{C}$ ):  $\delta$  140.2, 136.0, 135.1, 129.7, 128.5, 128.4, 128.3, 126.2, 62.4, 48.9, 44.1, 32.1, 26.0

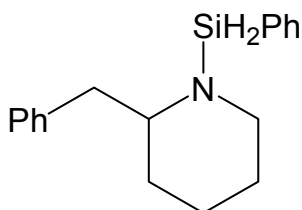

**2-benzyl-1-(phenylsilyl)piperidine**,  $^1\text{H}$ -NMR ( $\text{C}_6\text{D}_6$ , 400 MHz,  $25^\circ\text{C}$ )  $\delta$  7.30 – 6.76 (m, 10H, 2Ph), 4.70 (dd,  $J(^1\text{H}, ^1\text{H}) = 10$  Hz, 2 H), 3.05 (m, 1H), 2.76 – 2.70 (m, 2H); 2.55 (dd,  $J(^1\text{H}, ^1\text{H}) = 5.6$  Hz, 1H); 2.37 (dd,  $J(^1\text{H}, ^1\text{H}) = 7.5$  Hz, 1H); 1.25 – 1.07 (m, 6H);  $^{13}\text{C}\{^1\text{H}\}$ -NMR ( $\text{C}_6\text{D}_6$ , 100 MHz,  $25^\circ\text{C}$ ):  $\delta$  140.7, 136.1, 135.1, 130.2, 129.6, 128.5, 128.3, 126.2, 56.8, 43.3, 38.3, 30.0, 27.5, 20.8

[1] M. D. Taylor and C. P. Carter *J. Inorg. Nucl. Chem.* 1962, **24**, 387-391.

[2] R. Appel and I. Ruppert *Z. Anorg. Allg. Chem.* 1974, **406**, 131-144.
